# Supplementary material
Source: PubMed Central journal article supplement (PMC4104844)
Supplement: 1402526111_pnas.201402526SI.pdf [file 1402526111_pnas.201402526SI.pdf]

# Supporting Information

Li et al. 10.1073/pnas.1402526111

```

                exon 3                                intron 3                                exon 4
                L P G K A A |                      |                      A M T
hBCO2a..CTG CCT GGT AAA GCT GCA Ggtgat.....gtttcag| CC ATG ACT..
mBCO2 ..CCA CCT Agt aagtag.....cctggtttcag| CT ATG ACT..
                P P |                                |                      T M T...
                exon 3                                intron 3                                exon 4
    
```

**Fig. S1.** Splice junctions of exon 3/intron 3 and intron 3/exon 4 of the human and mouse  $\beta$ , $\beta$ -carotene-9',10'-dioxygenase (BCO2) genes. The insertion of GKAA in the human gene is caused by a change in the donor splice site in the human gene. Intron sequences are in lowercase, 5' and 3'-ends are printed in red.

|       |     |                                                                                                                                                                                                                                                                                                                                           |
|-------|-----|-------------------------------------------------------------------------------------------------------------------------------------------------------------------------------------------------------------------------------------------------------------------------------------------------------------------------------------------|
| Human | 1   | MGNT <b>PQ</b> KA <b>VFC</b> QCRCGLPCVAPLLTTVEEAPRGISARVWGHPFKWLNGLLRVGP <b>GF</b> EF                                                                                                                                                                                                                                                     |
| Mouse | 1   | -----MLC <b>PQ</b> SLPCVAPLLTTAEE <b>TL</b> SAVSARVRGHIP <b>EW</b> LNGLYLLRVGP <b>GF</b> EF                                                                                                                                                                                                                                               |
| Human | 61  | GKDKYNHWF <b>DGM</b> ALLH <b>QFR</b> MA <b>KG</b> TVTY <b>RSK</b> FLQSDTYKANS <b>AKNR</b> IVISEFGTLAL <b>PD</b> PC                                                                                                                                                                                                                        |
| Mouse | 52  | GKDRYNHWF <b>DGM</b> ALLH <b>QFR</b> ME <b>RG</b> TVTY <b>RSK</b> FLQSDTYKANS <b>AGGR</b> IVISEFGTLAL <b>PD</b> PC                                                                                                                                                                                                                        |
| Human | 121 | KNVFERFMSR <b>FEL</b> PG <b>KAA</b> AMTDNTNVNVVRYKGDY <b>Y</b> CTETNFMNKVDI <b>ET</b> LE <b>K</b> TEKVDW                                                                                                                                                                                                                                  |
| Mouse | 112 | KS <b>I</b> FERFMSR <b>FEP</b> -----TMTDNTNVNVV <b>QY</b> KGDY <b>Y</b> MS <b>T</b> ETNFMNKVDI <b>EM</b> LE <b>R</b> TEKVDW                                                                                                                                                                                                               |
| Human | 181 | SKFIAVNGATAH <b>PHY</b> D <b>LD</b> GTAYNMGN <b>S</b> GPY <b>G</b> FSYK <b>W</b> IRVP <b>PE</b> K <b>W</b> DLGETIH <b>GV</b> Q <b>V</b> IC <b>SI</b>                                                                                                                                                                                      |
| Mouse | 168 | SKFIAVNGATAH <b>PHY</b> D <b>FD</b> GTAYNMGN <b>S</b> GP <b>R</b> CSY <b>N</b> IRVP <b>PK</b> KE <b>P</b> GETIH <b>GA</b> Q <b>V</b> IC <b>SI</b>                                                                                                                                                                                         |
| Human | 241 | ASTE <b>K</b> G <b>K</b> PSY <b>Y</b> H <b>S</b> FG <b>M</b> TR <b>NY</b> I <b>IF</b> EQ <b>P</b> L <b>K</b> M <b>N</b> L <b>W</b> K <b>I</b> A <b>T</b> SK <b>I</b> R <b>G</b> K <b>A</b> F <b>S</b> D <b>G</b> I <b>S</b> W <b>E</b> P <b>Q</b> C <b>N</b> T <b>R</b> F <b>H</b>                                                        |
| Mouse | 228 | ASTE <b>K</b> M <b>K</b> PSY <b>Y</b> H <b>S</b> FG <b>M</b> T <b>K</b> NY <b>I</b> I <b>F</b> EQ <b>P</b> V <b>K</b> M <b>L</b> L <b>W</b> K <b>I</b> I <b>T</b> SK <b>I</b> R <b>G</b> K <b>P</b> E <b>A</b> D <b>G</b> I <b>S</b> W <b>E</b> P <b>Q</b> <b>Y</b> N <b>T</b> R <b>F</b> H                                               |
| Human | 301 | V <b>V</b> E <b>K</b> R <b>T</b> G <b>Q</b> L <b>L</b> P <b>G</b> R <b>Y</b> Y <b>S</b> K <b>P</b> F <b>V</b> T <b>F</b> H <b>Q</b> I <b>N</b> A <b>F</b> E <b>D</b> O <b>G</b> C <b>V</b> I <b>D</b> L <b>C</b> C <b>O</b> D <b>N</b> G <b>R</b> T <b>L</b> E <b>V</b> Y <b>Q</b> L <b>Q</b> N <b>L</b> R <b>K</b> A <b>G</b> E          |
| Mouse | 288 | V <b>V</b> D <b>K</b> H <b>T</b> G <b>Q</b> L <b>L</b> P <b>G</b> M <b>Y</b> S <b>M</b> P <b>F</b> L <b>T</b> H <b>Q</b> I <b>N</b> A <b>F</b> E <b>D</b> O <b>G</b> C <b>I</b> V <b>I</b> D <b>L</b> C <b>C</b> O <b>D</b> D <b>R</b> S <b>L</b> D <b>I</b> Y <b>Q</b> L <b>Q</b> N <b>L</b> R <b>K</b> A <b>G</b> E                     |
| Human | 361 | G <b>L</b> D <b>Q</b> V <b>H</b> N <b>S</b> A <b>A</b> K <b>S</b> F <b>P</b> R <b>R</b> F <b>V</b> L <b>P</b> L <b>N</b> V <b>S</b> L <b>N</b> A <b>P</b> E <b>G</b> D <b>N</b> L <b>S</b> P <b>L</b> S <b>Y</b> T <b>S</b> A <b>S</b> A <b>V</b> K <b>Q</b> A <b>D</b> C <b>T</b> I <b>W</b> C <b>S</b> H <b>E</b> N <b>L</b> H <b>Q</b> |
| Mouse | 348 | G <b>L</b> D <b>Q</b> V <b>Y</b> E <b>L</b> K <b>A</b> K <b>S</b> F <b>P</b> R <b>R</b> F <b>V</b> L <b>P</b> L <b>D</b> V <b>S</b> W <b>D</b> A <b>E</b> G <b>K</b> N <b>L</b> S <b>P</b> L <b>S</b> Y <b>S</b> S <b>A</b> S <b>A</b> V <b>K</b> Q <b>G</b> D <b>G</b> E <b>I</b> W <b>C</b> S <b>P</b> E <b>N</b> L <b>H</b> H          |
| Human | 421 | E <b>D</b> L <b>E</b> K <b>E</b> G <b>G</b> I <b>E</b> F <b>P</b> Q <b>I</b> Y <b>D</b> R <b>F</b> S <b>G</b> K <b>K</b> Y <b>H</b> F <b>F</b> Y <b>G</b> C <b>G</b> F <b>R</b> H <b>L</b> V <b>G</b> D <b>S</b> L <b>I</b> K <b>V</b> D <b>V</b> V <b>N</b> K <b>T</b> L <b>K</b> V <b>W</b> R <b>E</b> D <b>G</b> F <b>Y</b> P          |
| Mouse | 408 | E <b>D</b> L <b>E</b> E <b>E</b> G <b>G</b> I <b>E</b> F <b>P</b> Q <b>I</b> N <b>Y</b> G <b>R</b> E <b>N</b> G <b>K</b> K <b>Y</b> S <b>F</b> F <b>Y</b> G <b>C</b> G <b>F</b> R <b>H</b> L <b>V</b> G <b>D</b> S <b>L</b> I <b>K</b> V <b>D</b> V <b>T</b> N <b>K</b> T <b>L</b> R <b>V</b> W <b>R</b> E <b>E</b> G <b>F</b> Y <b>P</b> |
| Human | 481 | S <b>E</b> P <b>V</b> F <b>V</b> P <b>A</b> P <b>G</b> T <b>N</b> E <b>E</b> D <b>G</b> S <b>V</b> I <b>L</b> S <b>V</b> V <b>I</b> T <b>P</b> N <b>Q</b> S <b>E</b> S <b>N</b> F <b>L</b> L <b>V</b> L <b>D</b> A <b>K</b> N <b>F</b> E <b>L</b> G <b>R</b> A <b>E</b> V <b>P</b> V <b>Q</b> M <b>P</b> Y <b>G</b> F <b>H</b> G          |
| Mouse | 468 | S <b>E</b> P <b>V</b> F <b>V</b> P <b>V</b> P <b>G</b> A <b>E</b> E <b>D</b> S <b>G</b> V <b>I</b> L <b>S</b> V <b>V</b> I <b>T</b> P <b>N</b> Q <b>S</b> E <b>S</b> N <b>F</b> L <b>L</b> V <b>L</b> D <b>A</b> K <b>S</b> E <b>T</b> E <b>L</b> G <b>R</b> A <b>E</b> V <b>P</b> V <b>Q</b> M <b>P</b> Y <b>G</b> F <b>H</b> G          |
| Human | 541 | T <b>F</b> T <b>I</b> P <b>I</b>                                                                                                                                                                                                                                                                                                          |
| Mouse | 528 | T <b>F</b> V <b>I</b> P <b>I</b>                                                                                                                                                                                                                                                                                                          |

**Fig. S2.** Protein sequences of human BCO2 and mouse BCO2 used to design primers of mutagenesis experiments. Green underline shows the fragments switched between human BCO2 and mouse BCO2 and the vertical line shows the connection position. Blue underline shows the substituted amino acid positions between human BCO2 and mouse BCO2. These were numbered and the corresponding numbers are given to the primers in Table S1.

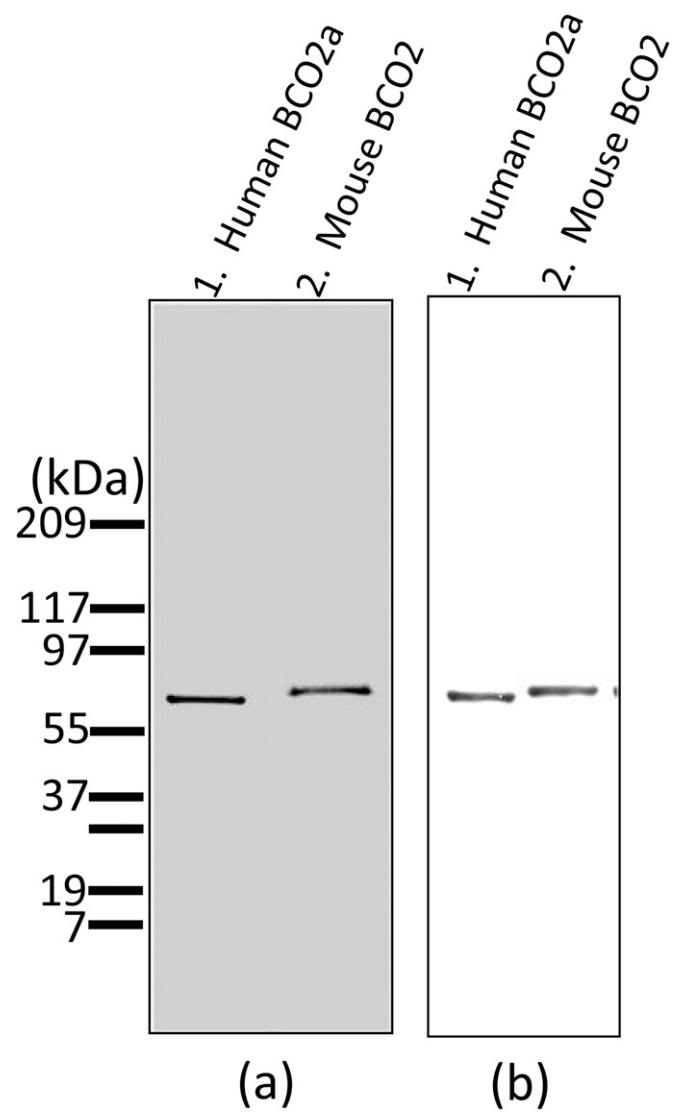

Fig. S3. SDS/PAGE (A) and Western blot (B) of recombinant human BCO2a (1), and mouse BCO2 (2) used for surface plasmon resonance (SPR).

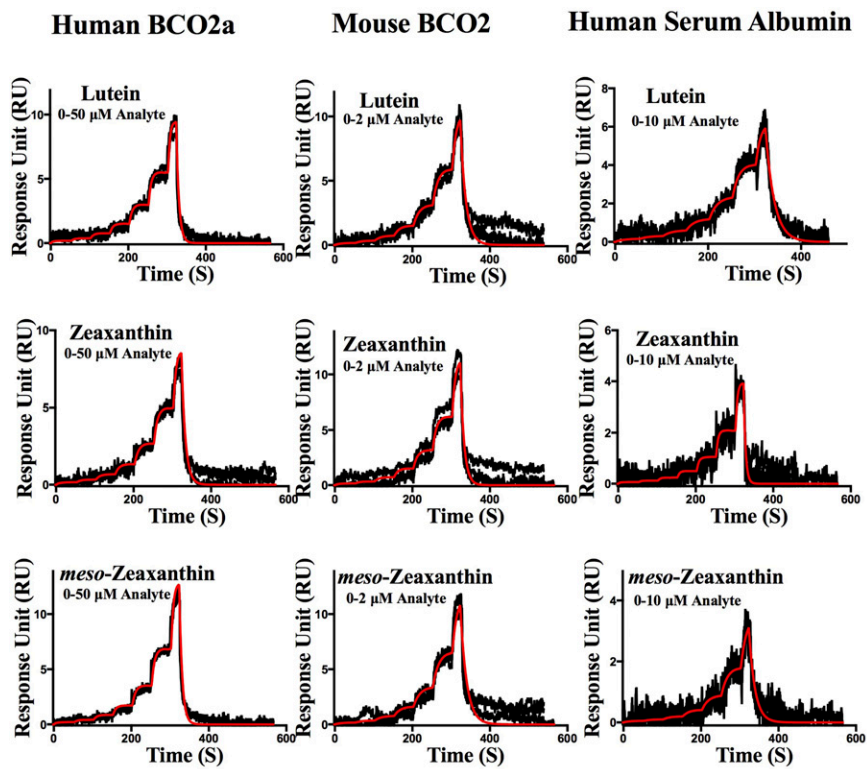

Fig. S4. SPR sensorgrams of carotenoids with human BCO2a, mouse BCO2, and human serum albumin.

**Table S1. Primers used in the mutagenesis experiments to restore the carotenoid cleavage function of human BCO2**

| Primer                                      | Sequence                                                                                                                                                                                                                                                                                                                                                                                      |
|---------------------------------------------|-----------------------------------------------------------------------------------------------------------------------------------------------------------------------------------------------------------------------------------------------------------------------------------------------------------------------------------------------------------------------------------------------|
| 1. T171M + k174R                            | 5'-AAATTTGCTCCAATCTACCTTTTCTGTTCTTTCCAGCATTTCAATGTCCACTTTATTCATAAAGTTG-3'<br>5'-CAACTTTATGAATAAAGTGGACATTGAAATGCTGGAAAAGACAGAAAAGGTAGATTGGAGCAAATTT-3'                                                                                                                                                                                                                                        |
| 2. L197P                                    | 5'-CACATCCTCATTATGACCCGGATGGAACAGCATACAA-3'<br>5'-TTGTATGCTGTTCCATCCGGGTATAAATGAGGATGTG-3'                                                                                                                                                                                                                                                                                                    |
| 3. F208Y, Y211R, F213S, S214C, K216N, V217I | 5'-CCTTCTCTGGAGGAACCCGAATAATATTATAGCAGTACCACGTGGCCCATAGGAGTTCCCCATATTGTATGCTG-3'                                                                                                                                                                                                                                                                                                              |
| 4. E223K, V225K, D226E, L227P               | 5'-CAGCATACAATATGGGGAACCTCTATGGGCCACGTGGTAGCTGCTATAATATTATTCGGGTTCTCCAGAGAAGG-3'<br>5'-GGATTGTCTCCCGAGCTCCTTCTTCTTTGGAGGAACCCGAATAACCTTATAGGA-3'<br>5'-TCCTATAAGTTTATTCGGGTTCTCCAAAGAAGAAGGAGCCTGGGGAGACAATCC-3'                                                                                                                                                                              |
| 5. V234, I237L                              | 5'-AGAAGCAATAGAACATAACACCTGGGCTCCATGGATTGTCTCC-3'<br>5'-GGAGACAATCCATGGAGCCAGGTGTTATGTTCTATTGCTTCT-3'                                                                                                                                                                                                                                                                                         |
| 6. G246M                                    | 5'-AAAGCTATGGTAGTAAGAAGGTTTCATTTTCTCTGTAGAAGCAATAGAACAT-3'<br>5'-ATGTTCTATGCTTCTACAGAGAAAATGAAACCTTCTTACTACCATAGCTTT-3'                                                                                                                                                                                                                                                                       |
| 7. R258K                                    | 5'-GTTGTTCAATGAAAATTATATAGTCTTTGTCATTCCAAAGCTATGGTAGTAA-3'<br>5'-TTACTACCATAGCTTTGGAATGACAAAGAACTATATAATTTTCATTGAACAAC-3'                                                                                                                                                                                                                                                                     |
| 8. I264V, L268V, N271K, A276I               | 5'-CTTCCCGAATTTAGAAAGTATAATTTCCACAGGTTTCATCTTTAGAG-3'<br>5'-GTTTCATCTTTAGAGGTTGTTCAACGAAAATTATATAGTTCCTTGTCTTTC-3'<br>5'-TAGAAGTGGCAATTTCCACAGCTTTCATCTTTACAGGTTGTTCAATGAAAATTATA-3'<br>5'-TATAATTTTCATTGAACAACCTGTAAGATGAAGCTGTGAAAAATTGCCACTTCTA-3'<br>5'-GAATGACAAGGAACATATAATTTTCGTTGAACAACCTCTAAAGATGAAC-3'<br>5'-CTCTAAAGATGAACCTGTGAAAATTACTTCTAAAATTCGGGGAAAG-3'                      |
| 9. A284P, S286A                             | 5'-CCAGCTTATCCCATCTGCAAGGGCTTTCCCGAATTTAG-3'<br>5'-CTAAAATTCGGGGAAAGCCCTTTGCAGATGGGATAAGCTGG-3'                                                                                                                                                                                                                                                                                               |
| 10. C295Y                                   | 5'-CATGAAACCGCGTATTATACTGGGGTTCACAGCTT-3'<br>5'-AAGCTGGGAACCCAGTATAATACGCGGTTTCATG-3'                                                                                                                                                                                                                                                                                                         |
| 11. E303D, R305H                            | 5'-GAAGGAGCTGCCAGTGTGTTTATCCACCACATGAAACCG-3'<br>5'-CGGTTTCATGTGGTGGATAAACACACTGGACAGCTCCTTC-3'                                                                                                                                                                                                                                                                                               |
| 12. R313M, K317M, V320L, F322Y              | 5'-AAAGGCATTTGATGATATGTAAGAAAAGGCATGCTGTAGTACATCCCTGGAAGGAGCTGTCCAGT-3'<br>5'-ACTGGACAGCTCCTTCCAGGGATGACTACAGCATGCCTTTTCTTACATATCATCAATCAATGCCTTT-3'                                                                                                                                                                                                                                          |
| 13. V334I, I335V                            | 5'-TTGACAGCACAAATCAATTACAATACAGCCCTGGTCTCAAAGG-3'<br>5'-CCTTTGAGGACCAGGGCTGTATTGTAATTGATTGTGCTGTCAA-3'                                                                                                                                                                                                                                                                                        |
| 14. N343D, T346S, E348D, V349L              | 5'-CTGAGATTCGTAACCTGGTAAGAATCTAGGCTTCTTCCATCATCTTGACAGCACAAATCAATT-3'<br>5'-AATTGATTTGTGCTGTCAAGATGATGGAAGAAGCCTAGATCTTTACCAGTTACAGAATCTCAG-3'                                                                                                                                                                                                                                                |
| 15. H366Y, N367E, S368L, A369K              | 5'-CAAACCTTCGAGGGAAGATTTGGCTTTTAACTCATAGACCTGATCAAGCCCTTCCCAGCCT-3'<br>5'-AGGCTGGGGAAGGCTTGATCAGGTCATGAGTTAAAAGCCAAATCTTTCCCTCGAAGGTTG-3'                                                                                                                                                                                                                                                     |
| 16. N382D, L385V, N386D, P388A, D391K       | 5'-TCGAAGGTTTGTGCTTTAGATGTCAGTGTGGATGCCGCTGAGGGAAGAAACCTGAGTCCA-3'<br>5'-TGGACTCAGGTTCTTTCCCTCAGCGCATCCACACTGACATCTAAAGGCAAAACAACTTCGA-3'                                                                                                                                                                                                                                                     |
| 17. T399S                                   | 5'-CAGCACTGGCTGAAGAATAGACAATGGACTCAGG-3'<br>5'-CCTGAGTCCATTGCTCTATTCTTCAGCCAGTGTG-3'                                                                                                                                                                                                                                                                                                          |
| 18. A407G, T410E, H415P, Q420H, K425E       | 5'-CAATGCCTCCTTCTCTTCTAGGCTCCTCTGATGT-3'<br>5'-ACATCAGGAGGACCTAGAAGGGAAGGAGGCATG-3'<br>5'-TCTCATGAAAATCTACATCATGAGGACCTAGAAAAGGAAGG-3'<br>5'-GAACGATCTGGTGTCTCTGAAAATCTACATCAGGA-3'<br>5'-CAGTGTGTGAAACAGGGTGTGGAGAGATCTGGTGTCTCATG-3'<br>5'-CATGAGAGCACCAGATCTCTCCATCACCCTGTTTCACAGCACTG-3'<br>5'-CCTTCTTTTCTAGGCTCCTCATGATGTAGATTTTCATGAGA-3'<br>5'-TCCTGATGTAGATTTTCCAGGAGACACAGATCGTTC-3' |
| 19. Y435N, D437G, S440N, H445S              | 5'-CCACAGCCATAAAAGAACTATACTTTTTGCCACTGAATCGATCATAGTAGAT-3'<br>5'-ATCTACTATGATCGATTCAAGTGGCAAAAAGTATAGTTTCTTTTATGGCTGTGG-3'<br>5'-AAAAGAAATGATACTTTTTGCCATTGAATCGACCATAGTTGATCTGAGGAAATTCATGCCTC-3'<br>5'-GAGGCATTGAATTTCTCAGATCAACTATGGTCGATTCATGGCAAAAAGTATCATTTCTTTT-3'                                                                                                                     |
| 20. V466T, K471R, D476E                     | 5'-GAGGGATAAAAGCCCTCTTCTCCAAACCTTCAGTG-3'<br>5'-CCAAACCTTCAGTGTCTTATTCTGTCACATCAACCTTGATCAGAGAA-3'<br>5'-TTCTCTCCAAACCCCTCAGTGTCTTATTCACCATCAAC-3'<br>5'-TTCTCTGATCAAGGTTGATGTGACGAATAAGACACTGAAGGTTTGG-3'<br>5'-CACTGAAGGTTTGGAGAGAAGAGGGCTTTTATCCCTC-3'<br>5'-GTTGATGTGGTGAATAAGACACTGAGGGTTTGGAGAGAA-3'                                                                                    |
| 21. A488V, T491A, N492D, G496S              | 5'-AGAATAACCCCACTATCTTCTTTCATTGGTTCCTGGTGC-3'<br>5'-CCCACATCTTCTCATCGGCTCCTGGTACTGGAACAAAACAGGT-3'<br>5'-GCACCAGGAACCAATGAAGAAGATAGTGGGGTTATTCT-3'<br>5'-ACCTGTTTTTGTCCAGTACCAGGAGCCGATGAAGAAGATGGTGGG-3'                                                                                                                                                                                     |
| 22. N509S, I514L                            | 5'-CATCCAAAACCTAGGAGAAAATGCTTTTCATTCTGGTTGGGAGTGA-3'<br>5'-GGATAAAAATGCTTTCCTCTGGTTGGGAGTATCACA-3'                                                                                                                                                                                                                                                                                            |

Table S1. Cont.

| Primer                                   | Sequence                                                                                                                                                                                                                                                                                                      |
|------------------------------------------|---------------------------------------------------------------------------------------------------------------------------------------------------------------------------------------------------------------------------------------------------------------------------------------------------------------|
|                                          | 5'-TGGTGATCACTCCAACAGAGTGAAGCAATTTTATCC-3'<br>5'-TCACTCCCAACCAGAAATGAAAGCAATTTCTCCTAGTTTTGGATG-3'                                                                                                                                                                                                             |
| 23. N521S, E523T                         | 5'-ACCTCTGCTCGGCCAGCTCCGTAAAGCTCTTGGCATCCAAAAC TAGG-3'<br>5'-CCTAGTTTTGGATGCCAAGAGCTTTACGGAGCTGGGCCGAGCAGAGGT-3'                                                                                                                                                                                              |
| 24. I543V                                | 5'-CTCGAGCTAGATGGGTACGAAGGTACCATGGAACC-3'<br>5'-GGTTCCATGGTACCTTCGTACCCATCTAGCTCGAG-3'                                                                                                                                                                                                                        |
| 25. Mouse BCO2+GKAA                      | 5'-ATGTCAAGGTTTGAGCCACCTGGTAAAGCTGCAACTATGACTGACAACAC-3'<br>5'-GTGTTGT CAGTCATAGTTGCAGCTTTACCAGGTGGCTCAAACCTTGACAT-3'                                                                                                                                                                                         |
| 26. Human BCO2-GKAA+A→T                  | 5'-GTCCAGGTTTGAGCTGCCTATGACTGACAATACTAATG-3'<br>5'-CATTAGTATTGTCAGTCATAGGCAGCTCAAACCTGGAC-3'<br>5'-TCCAGGTTTGAGCTGCCTACCATGACTGACAATA-3'<br>5'-TATTGT CAGTCATGGTAGGCAGCTCAAACCTGGA-3'                                                                                                                         |
| 27. N-terminal switch                    | 5'-ATGAATAAGGTGGACATTGAGATGC-3'<br>5'-CCCCGGGCTCTTTCTTTTTG-3'<br>5'-TTCGAAGGAATTCGGTACCATGGGAAATACTCCTCAGAAAAAGC-3'<br>5'-AGCATCTCAATGTCACCTTATTCATAAAGTTGGTCTCAGTGCAG-3'<br>5'-AAAACCTGTATTTTCAGGGCGAAGGAGTTCGAACCATGTTGGGACCGAAGCAAAG-3'<br>5'-TCTGTTTTTTCCAGAGTTTCAATGTCCACTTTATTCATAAAATTAGTCTCTGTGCTC-3' |
| 28. Human BCO2-GKAA with N122S           | 5'-TCTCCCGGATCCATGCAAGAGTATTTTTGAACGTTTCATGTCC-3'<br>5'-GGACATGAAACGTTCAAAAATACTCTTGATGGATCCGGGAGA-3'                                                                                                                                                                                                         |
| 29. Human BCO2-GKAA with L133P           | 5'-ATGTCCAGGTTTGAGCCGCCTACCATGACTGAC-3'<br>5'-GTCAGTCATGGTAGGCGGCTCAAACCTGGACAT-3'                                                                                                                                                                                                                            |
| 30. Human BCO2-GKAA with Y435N, D437G    | 5'-GGCATTGAATTTCTCAGATCAACTATGGTCGATTGAGGCAAAAAGTA-3'                                                                                                                                                                                                                                                         |
| 31. Human BCO2-GKAA with S440N           | 5'-TACTTTTTGCCACTGAATCGACCATAGTTGATCTGAGGAAATTCATGCC-3'<br>5'-TTCCCTCAGATCAACTATGGTCGATTCAATGGCAAAAAGTATC-3'<br>5'-GATACTTTTTGCCATTGAATCGACCATAGTTGATCTGAGGAA-3'                                                                                                                                              |
| 32. Human BCO2-GKAA with L133P and S440N | 5'-ATGTCCAGGTTTGAGCCGCCTACCATGACTGAC-3'<br>5'-GTCAGTCATGGTAGGCGGCTCAAACCTGGACAT-3'<br>5'-TTCCCTCAGATCAACTATGGTCGATTCAATGGCAAAAAGTATC-3'<br>5'-GATACTTTTTGCCATTGAATCGACCATAGTTGATCTGAGGAA-3'                                                                                                                   |
